# Supplementary material for: Prevalence and Antimicrobial Resistance Profile of Diarrheagenic Escherichia coli from Fomites in Rural Households in South Africa
Source: MDPI journal article supplement (doi:10.3390/antibiotics12081345), 2023-08-21
Supplement: s1 [file s1]

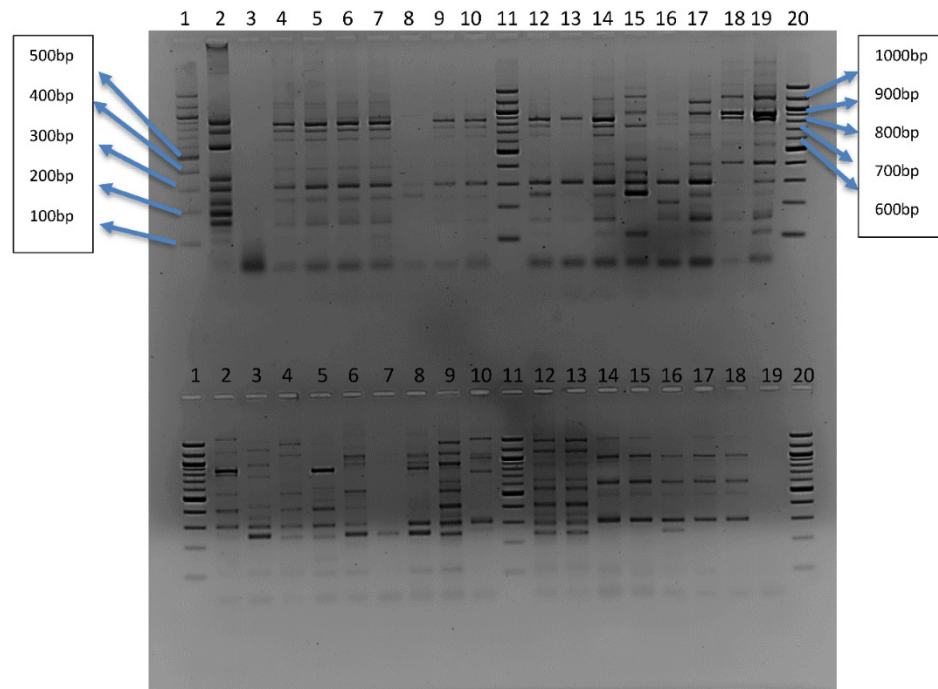

| Top wells           | Bottom wells          |
|---------------------|-----------------------|
| Lane1: 100bp ladder | Lane1: 100bp ladder   |
| Lane2: +ve control  | Lane2: H14TH          |
| Lane3: -ve control  | Lane3: H16KC          |
| Lane4: H1KC         | Lane4: H16TH          |
| Lane5: H1TS         | Lane5: H17TH          |
| Lane6: H2KC         | Lane6: H18KC          |
| Lane7: H3KC         | Lane7: H21TH          |
| Lane8: H3TH         | Lane8: H21TS          |
| Lane9: H4KC         | Lane9: H22KC          |
| Lane10: H7KC        | Lane10: H23KC         |
| Lane11: H7TH        | Lane11: ladder        |
| Lane12: H7TS        | Lane12: H24KC         |
| Lane13: H8KC        | Lane13: H25KC         |
| Lane14: H10KC       | Lane14: H26TS         |
| Lane15: H10TH       | Lane15: H28KC         |
| Lane16: H10TS       | Lane16: H28TH         |
| Lane17: H11KC       | Lane17: H28TS         |
| Lane18: H12KC       | Lane18: H35KC         |
| Lane19: H14KC       | Lane19: xtrection -ve |
| Lane20: ladder      | Lane20: ladder        |

(a) Gel picture A

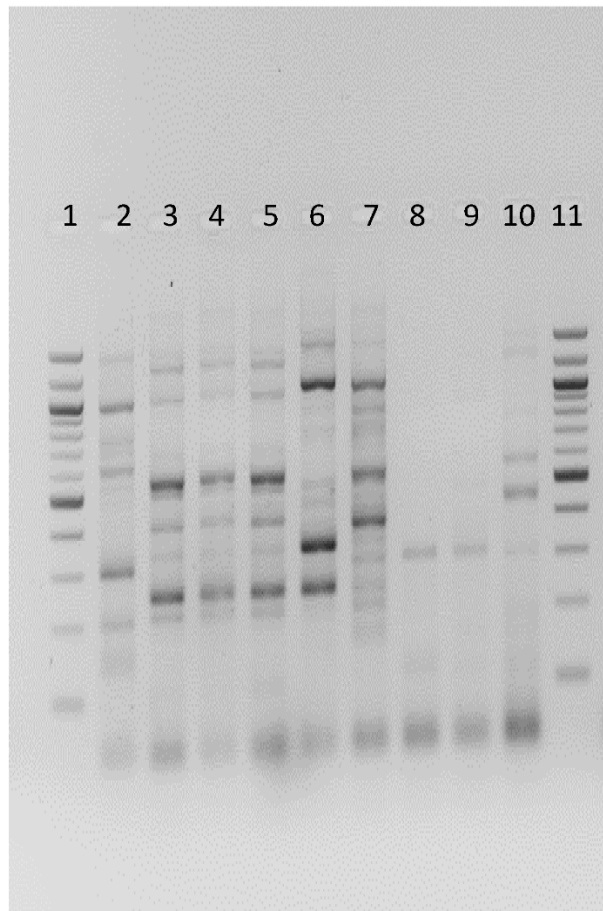

#### Top wells

Lane1: 100bp ladder  
 Lane2: +ve control  
 Lane3: H24TS  
 Lane4: H32KC  
 Lane5: H33KC  
 Lane6: H34KC  
 Lane7: H30TS  
 Lane8: H27TH  
 Lane9: H35TH  
 Lane10: H35TS  
 Lane11: ladder

#### Meaning of the sample code:

H- Household

TS- Toilet seat

TH- Toilet door handle

(b) Gel Picture B

**Supplementary Figure S1.** Depicts gel images A and B, showcasing the multiplex PCR results for detecting different *E. coli* genes on household kitchen cloths and toilet surfaces.
